# Supplementary material
Source: PubMed Central journal article supplement (PMC6864238)
Supplement: NIHMS1526408-supplement-Supplemental_Data_File_2__doc___tif__pdf__etc__.pdf [file NIHMS1526408-supplement-Supplemental_Data_File_2__doc___tif__pdf__etc__.pdf]

Figure that displays monotonicity plots of the item response function with no violations of monotonicity for the 22 common items of the Hearing Handicap Inventory for the Elderly (HHIE) and the Hearing Handicap Inventory for Adults (HHIA).

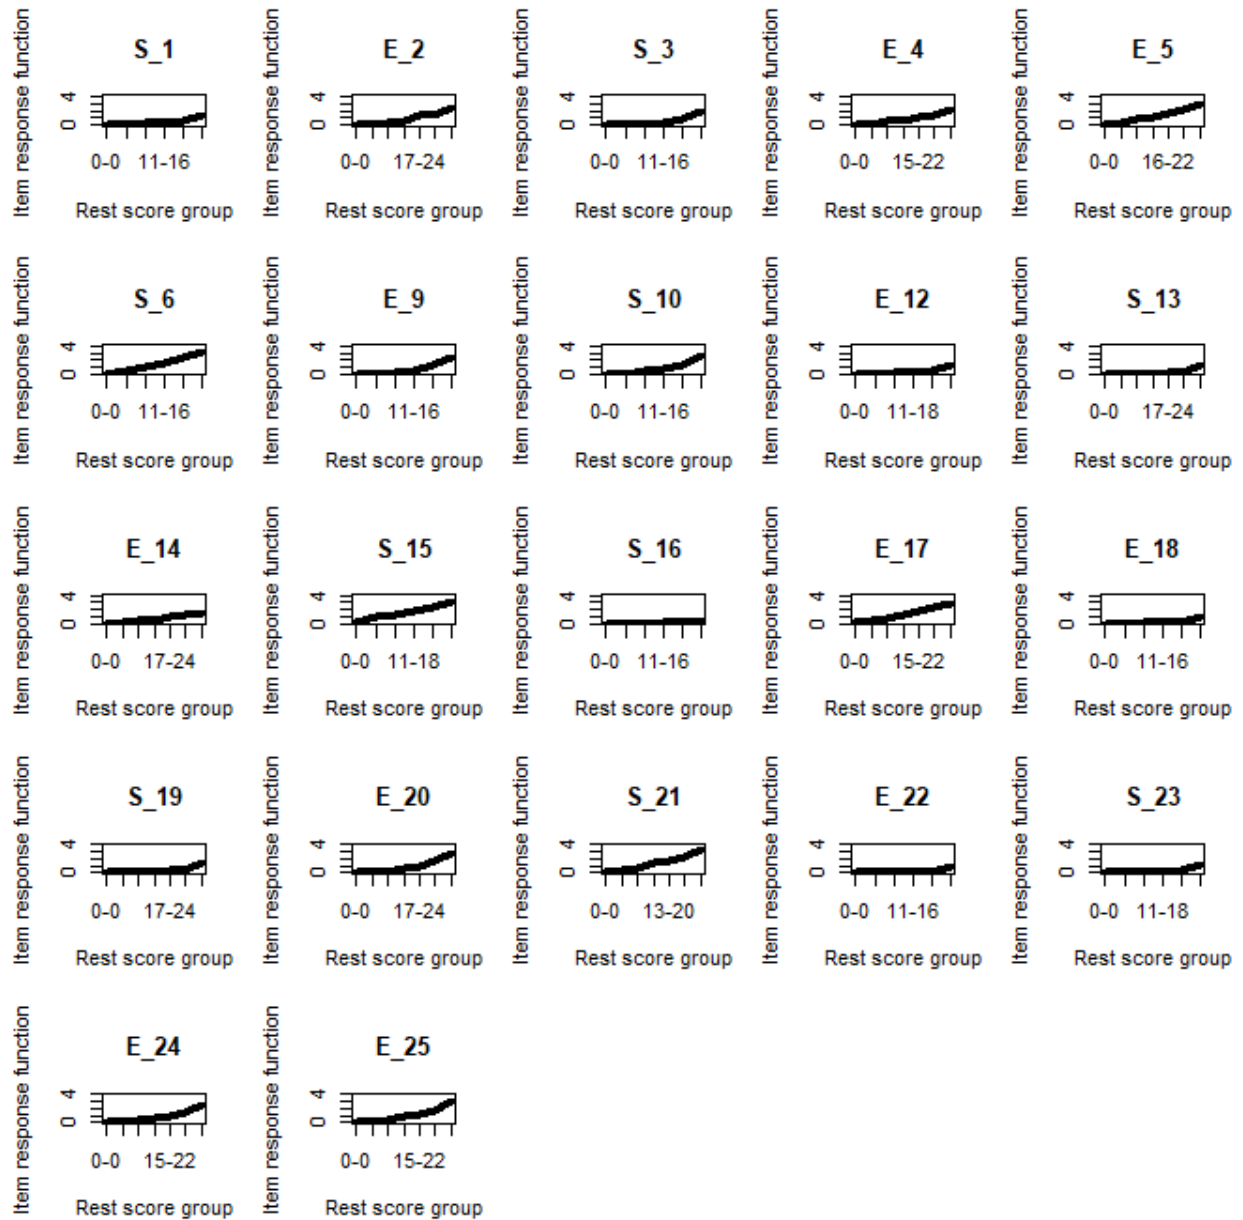

The item numbers refer to the HHIE. E\_9 is labeled E-8 on the HHIA and S\_10 is labeled S-9 on the HHIA.
