# Supplementary material
Source: PubMed Central journal article supplement (PMC6864238)
Supplement: NIHMS1526408-supplement-Supplemental_Data_File_3__doc___tif__pdf__etc__.pdf [file NIHMS1526408-supplement-Supplemental_Data_File_3__doc___tif__pdf__etc__.pdf]

## Revised Hearing Handicap Inventory (RHHI)

Instructions: The purpose of this scale is to identify the problems your hearing loss may be causing you. Answer YES, SOMETIMES, or NO for each question. Do not skip a question if you avoid a situation because of your hearing problem. If you use a hearing aid, please answer the way you hear without the aid.

|                                                                                                               | YES<br>(4) | SOME-<br>TIMES<br>(2) | NO<br>(0) |
|---------------------------------------------------------------------------------------------------------------|------------|-----------------------|-----------|
| 1. Does a hearing problem cause you difficulty when listening to TV or radio?                                 | ___        | ___                   | ___       |
| 2. Does a hearing problem cause you difficulty when attending a party?                                        | ___        | ___                   | ___       |
| 3. Does any problem or difficulty with your hearing upset you at all?                                         | ___        | ___                   | ___       |
| 4. Does a hearing problem cause you to feel frustrated when talking to members of your family?                | ___        | ___                   | ___       |
| 5. Does a hearing problem cause you to feel left out when you are with a group of people?                     | ___        | ___                   | ___       |
| 6. Does a hearing problem cause you difficulty when visiting friends, relatives or neighbors?                 | ___        | ___                   | ___       |
| 7. Do you feel handicapped by a hearing problem?                                                              | ___        | ___                   | ___       |
| 8. Do you feel that any difficulty with your hearing limits or hampers your personal or social life?          | ___        | ___                   | ___       |
| 9. Does a hearing problem cause you to feel uncomfortable when talking to friends?                            | ___        | ___                   | ___       |
| 10. Does a hearing problem cause you to avoid groups of people?                                               | ___        | ___                   | ___       |
| 11. Does a hearing problem cause you to use the phone less often than you would like?                         | ___        | ___                   | ___       |
| 12. Does a hearing problem cause you to be nervous?                                                           | ___        | ___                   | ___       |
| 13. Does a hearing problem cause you to listen to TV or radio less often than you would like?                 | ___        | ___                   | ___       |
| 14. Does a hearing problem cause you to talk to family members less often than you would like?                | ___        | ___                   | ___       |
| 15. Does a hearing problem cause you to want to be by yourself?                                               | ___        | ___                   | ___       |
| 16. Does a hearing problem cause you to feel depressed?                                                       | ___        | ___                   | ___       |
| 17. Does a hearing problem cause you to visit friends, relatives or neighbors less often than you would like? | ___        | ___                   | ___       |
| 18. Does a hearing problem cause you to go shopping less often than you would like?                           | ___        | ___                   | ___       |

FOR CLINICIAN'S USE ONLY: Total score: \_\_\_\_\_
