# Supplementary material
Source: PubMed Central journal article supplement (PMC6864238)
Supplement: NIHMS1526408-supplement-Supplemental_Data_File_4__doc___tif__pdf__etc__.pdf [file NIHMS1526408-supplement-Supplemental_Data_File_4__doc___tif__pdf__etc__.pdf]

Revised Hearing Handicap Inventory – Screening (RHHI-S)

Instructions: The purpose of this scale is to identify the problems your hearing loss may be causing you. Answer YES, SOMETIMES, or NO for each question. Do not skip a question if you avoid a situation because of your hearing problem. If you use a hearing aid, please answer the way you hear without the aid.

|                                                                                                               | YES<br>(4) | SOME-<br>TIMES<br>(2) | NO<br>(0) |
|---------------------------------------------------------------------------------------------------------------|------------|-----------------------|-----------|
| 1. Does a hearing problem cause you difficulty when listening to TV or radio?                                 | ___        | ___                   | ___       |
| 2. Does a hearing problem cause you difficulty when attending a party?                                        | ___        | ___                   | ___       |
| 3. Does a hearing problem cause you to feel frustrated when talking to members of your family?                | ___        | ___                   | ___       |
| 4. Does a hearing problem cause you to feel left out when you are with a group of people?                     | ___        | ___                   | ___       |
| 5. Does a hearing problem cause you difficulty when visiting friends, relatives or neighbors?                 | ___        | ___                   | ___       |
| 6. Do you feel handicapped by a hearing problem?                                                              | ___        | ___                   | ___       |
| 7. Do you feel that any difficulty with your hearing limits or hampers your personal or social life?          | ___        | ___                   | ___       |
| 8. Does a hearing problem cause you to feel uncomfortable when talking to friends?                            | ___        | ___                   | ___       |
| 9. Does a hearing problem cause you to avoid groups of people?                                                | ___        | ___                   | ___       |
| 10. Does a hearing problem cause you to visit friends, relatives or neighbors less often than you would like? | ___        | ___                   | ___       |

FOR CLINICIAN'S USE ONLY: Total score: \_\_\_\_\_
