# Supplementary material
Source: PubMed Central journal article supplement (PMC6864238)

Figure that displays monotonicity plots of the item response function with no violations of monotonicity for the items from the original Hearing Handicap Inventory for the Elderly screening version.

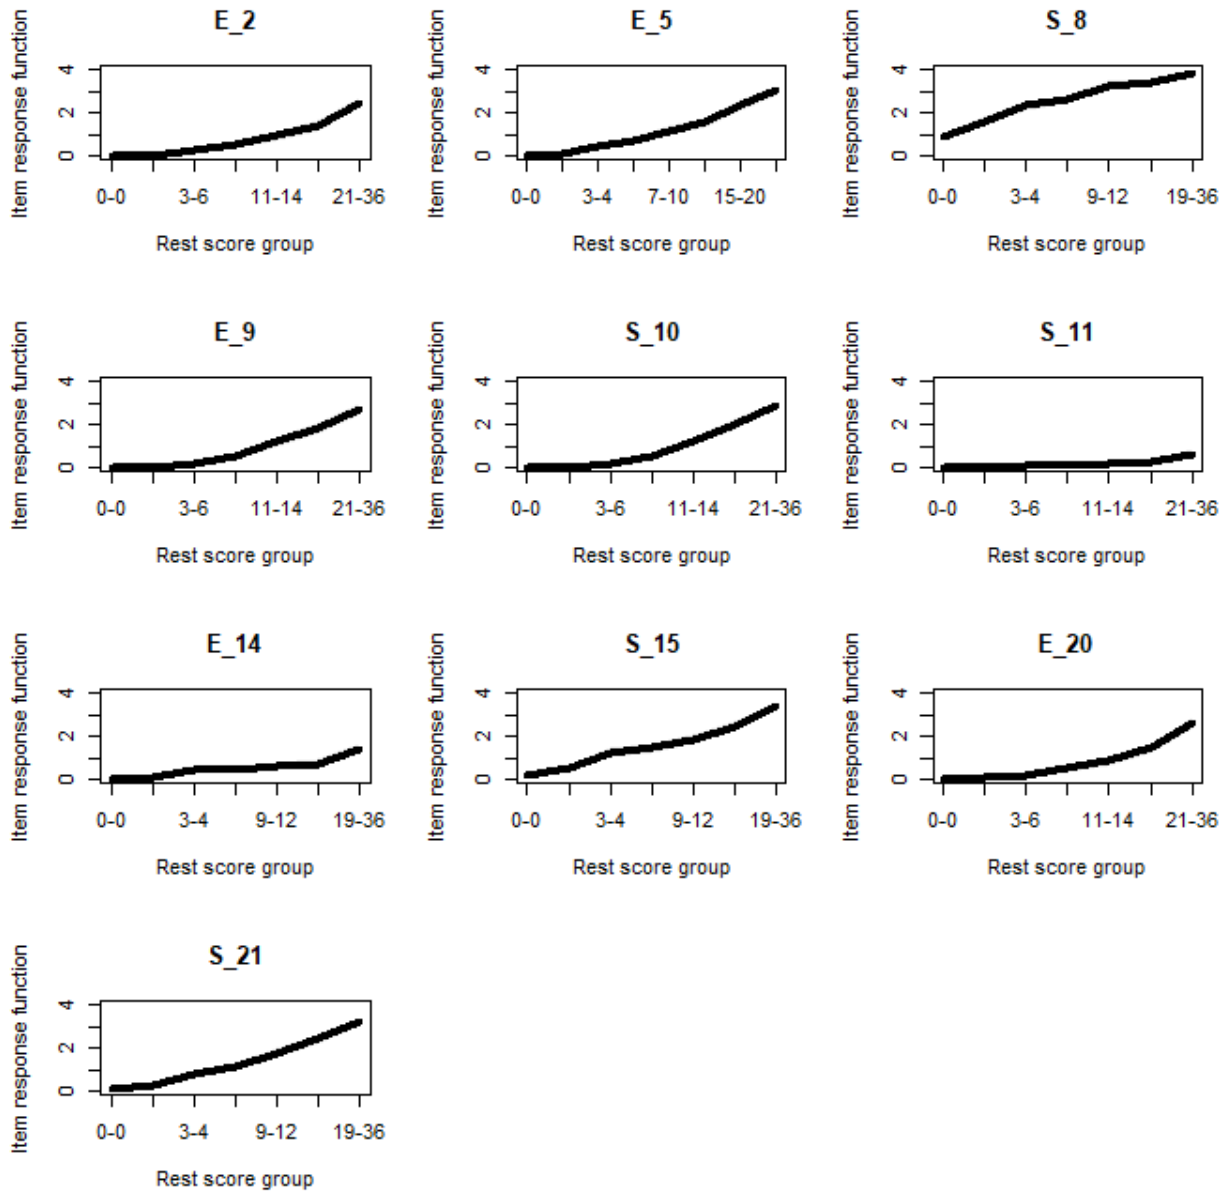

Supplement: NIHMS1526408-supplement-Supplemental_Data_File_5__doc___tif__pdf__etc__.pdf [file NIHMS1526408-supplement-Supplemental_Data_File_5__doc___tif__pdf__etc__.pdf]
